# Supplementary material for: Conservation of shibire and RpII215 temperature-sensitive lethal mutations between Drosophila and Bactrocera tryoni
Source: Frontiers journal article supplement (doi:10.3389/finsc.2024.1249103), 2024-03-04
Supplement: Data_Sheet_1.pdf [file Data_Sheet_1.pdf]

*Supplementary Material*

**Conservation of *shibire* and *RpII215* temperature sensitive lethal mutations between *Drosophila* and *Bactrocera tryoni***

**Thu N. M. Nguyen<sup>1</sup>, Amanda Choo<sup>2</sup> and Simon W. Baxter<sup>1\*</sup>**

**First Author, Co-Author, Co-Author**

**\* Correspondence:** Simon W. Baxter: [simon.baxter@unimelb.edu.au](mailto:simon.baxter@unimelb.edu.au)

A

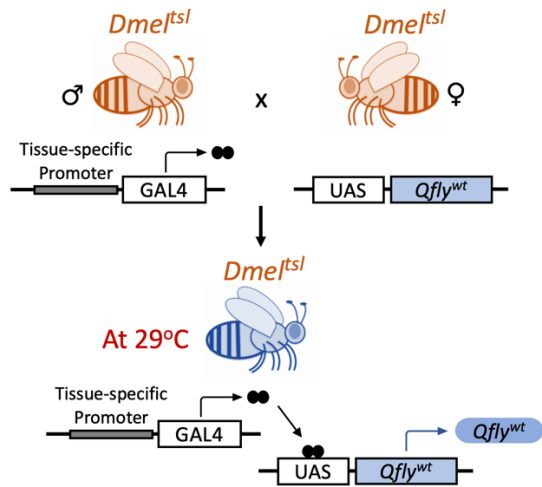

B

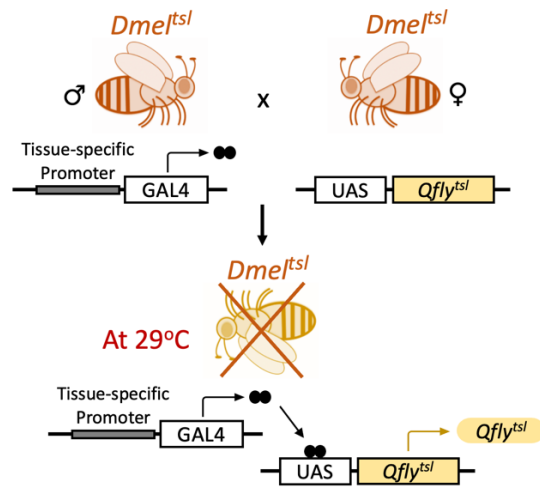

**Supplementary Figure S1. Schematic diagram of using *Drosophila melanogaster* GAL4-UAS system to assess whether *Bactrocera tryoni shi* and *RpII215* alleles with equivalent *D. melanogaster* temperature sensitive mutations in *shi* and *RpII215* would render homozygous insects' temperature sensitive.** Male flies carrying a tissue-specific GAL4 driver in the *D. melanogaster* temperature sensitive mutant background (*Dmel<sup>tsl</sup>*) were crossed with female flies carrying UAS-linked *B. tryoni Qfly<sup>wt</sup>* or *Qfly<sup>tsl</sup>* transgene in the *Dmel<sup>tsl</sup>* background, producing progeny containing both elements of the system. The GAL4 protein was produced in a tissue-specific manner and will bind to the UAS sites upstream a gene of interest (*B. tryoni Qfly<sup>wt</sup>* or *Qfly<sup>tsl</sup>*), hence inducing expression of that gene in a specific tissue. If expression of the *B. tryoni Qfly<sup>wt</sup>* rescues the lethal phenotype associated with *Dmel<sup>tsl</sup>* at the restricted high temperature 29°C and *B. tryoni Qfly<sup>tsl</sup>* fails to rescue, this indicates that the particular amino acid in the *Qfly<sup>tsl</sup>* that differs from *Qfly<sup>wt</sup>* is involved in the normal function of the gene at high temperatures.

1. Dmel shibire 'short'
2. Btry shibire 'short'
3. XP\_039960167.1:1-840
4. XP\_039960166.1:1-865
5. XP\_039960154.1:1-914
6. XP\_039960162.1:1-913
7. XP\_039960165.1:1-905
8. XP\_039960164.1:1-909
9. XP\_039960163.1:1-910

3

**Supplementary Figure S3. Protein alignment of *Drosophila melanogaster* RNA polymerase II 215 (RpII215) isoform and its ortholog on *Bactrocera tryoni*.** *Drosophila* RpII215 shares 93% identity with *B. tryoni* ortholog, and the amino acid that is mutated in the *Drosophila* temperature sensitive *RpII215<sup>ts</sup>* mutant (R977C) (outlined with a red square) is conserved in *B. tryoni*.

|                 |       |       |       |       |       |       |       |       |       |       |       |       |
|-----------------|-------|-------|-------|-------|-------|-------|-------|-------|-------|-------|-------|-------|
| 1. Dmel RpII215 | 1     | 10    | 20    | 30    | 40    | 50    | 60    | 70    | 80    | 90    | 100   | 110   |
| 2. Btry RpII215 | 1     | 10    | 20    | 30    | 40    | 50    | 60    | 70    | 80    | 90    | 100   | 110   |
| 1. Dmel RpII215 | 120   | 130   | 140   | 150   | 160   | 170   | 180   | 190   | 200   | 210   | 220   |       |
| 2. Btry RpII215 | 120   | 130   | 140   | 150   | 160   | 170   | 180   | 190   | 200   | 210   | 220   |       |
| 1. Dmel RpII215 | 230   | 240   | 250   | 260   | 270   | 280   | 290   | 300   | 310   | 320   | 330   |       |
| 2. Btry RpII215 | 230   | 240   | 250   | 260   | 270   | 280   | 290   | 300   | 310   | 320   | 330   |       |
| 1. Dmel RpII215 | 340   | 350   | 360   | 370   | 380   | 390   | 400   | 410   | 420   | 430   | 440   |       |
| 2. Btry RpII215 | 340   | 350   | 360   | 370   | 380   | 390   | 400   | 410   | 420   | 430   | 440   |       |
| 1. Dmel RpII215 | 450   | 460   | 470   | 480   | 490   | 500   | 510   | 520   | 530   | 540   | 550   | 560   |
| 2. Btry RpII215 | 450   | 460   | 470   | 480   | 490   | 500   | 510   | 520   | 530   | 540   | 550   | 560   |
| 1. Dmel RpII215 | 570   | 580   | 590   | 600   | 610   | 620   | 630   | 640   | 650   | 660   | 670   |       |
| 2. Btry RpII215 | 570   | 580   | 590   | 600   | 610   | 620   | 630   | 640   | 650   | 660   | 670   |       |
| 1. Dmel RpII215 | 680   | 690   | 700   | 710   | 720   | 730   | 740   | 750   | 760   | 770   | 780   |       |
| 2. Btry RpII215 | 680   | 690   | 700   | 710   | 720   | 730   | 740   | 750   | 760   | 770   | 780   |       |
| 1. Dmel RpII215 | 790   | 800   | 810   | 820   | 830   | 840   | 850   | 860   | 870   | 880   | 890   |       |
| 2. Btry RpII215 | 790   | 800   | 810   | 820   | 830   | 840   | 850   | 860   | 870   | 880   | 890   |       |
| 1. Dmel RpII215 | 900   | 910   | 920   | 930   | 940   | 950   | 960   | 970   | 980   | 990   | 1,000 |       |
| 2. Btry RpII215 | 900   | 910   | 920   | 930   | 940   | 950   | 960   | 970   | 980   | 990   | 1,000 |       |
| 1. Dmel RpII215 | 1,010 | 1,020 | 1,030 | 1,040 | 1,050 | 1,060 | 1,070 | 1,080 | 1,090 | 1,100 | 1,110 | 1,120 |
| 2. Btry RpII215 | 1,010 | 1,020 | 1,030 | 1,040 | 1,050 | 1,060 | 1,070 | 1,080 | 1,090 | 1,100 | 1,110 | 1,120 |
| 1. Dmel RpII215 | 1,130 | 1,140 | 1,150 | 1,160 | 1,170 | 1,180 | 1,190 | 1,200 | 1,210 | 1,220 | 1,230 |       |
| 2. Btry RpII215 | 1,130 | 1,140 | 1,150 | 1,160 | 1,170 | 1,180 | 1,190 | 1,200 | 1,210 | 1,220 | 1,230 |       |
| 1. Dmel RpII215 | 1,240 | 1,250 | 1,260 | 1,270 | 1,280 | 1,290 | 1,300 | 1,310 | 1,320 | 1,330 | 1,340 |       |
| 2. Btry RpII215 | 1,240 | 1,250 | 1,260 | 1,270 | 1,280 | 1,290 | 1,300 | 1,310 | 1,320 | 1,330 | 1,340 |       |
| 1. Dmel RpII215 | 1,350 | 1,360 | 1,370 | 1,380 | 1,390 | 1,400 | 1,410 | 1,420 | 1,430 | 1,440 | 1,450 |       |
| 2. Btry RpII215 | 1,350 | 1,360 | 1,370 | 1,380 | 1,390 | 1,400 | 1,410 | 1,420 | 1,430 | 1,440 | 1,450 |       |
| 1. Dmel RpII215 | 1,460 | 1,470 | 1,480 | 1,490 | 1,500 | 1,510 | 1,520 | 1,530 | 1,540 | 1,550 | 1,560 |       |
| 2. Btry RpII215 | 1,460 | 1,470 | 1,480 | 1,490 | 1,500 | 1,510 | 1,520 | 1,530 | 1,540 | 1,550 | 1,560 |       |
| 1. Dmel RpII215 | 1,570 | 1,580 | 1,590 | 1,600 | 1,610 | 1,620 | 1,630 | 1,640 | 1,650 | 1,660 | 1,670 | 1,680 |
| 2. Btry RpII215 | 1,570 | 1,580 | 1,590 | 1,600 | 1,610 | 1,620 | 1,630 | 1,640 | 1,650 | 1,660 | 1,670 | 1,680 |
| 1. Dmel RpII215 | 1,690 | 1,700 | 1,710 | 1,720 | 1,730 | 1,740 | 1,750 | 1,760 | 1,770 | 1,780 | 1,790 |       |
| 2. Btry RpII215 | 1,690 | 1,700 | 1,710 | 1,720 | 1,730 | 1,740 | 1,750 | 1,760 | 1,770 | 1,780 | 1,790 |       |
| 1. Dmel RpII215 | 1,800 | 1,810 | 1,820 | 1,830 | 1,840 | 1,850 | 1,860 | 1,870 | 1,880 | 1,890 | 1,900 |       |
| 2. Btry RpII215 | 1,800 | 1,810 | 1,820 | 1,830 | 1,840 | 1,850 | 1,860 | 1,870 | 1,880 | 1,890 | 1,900 |       |



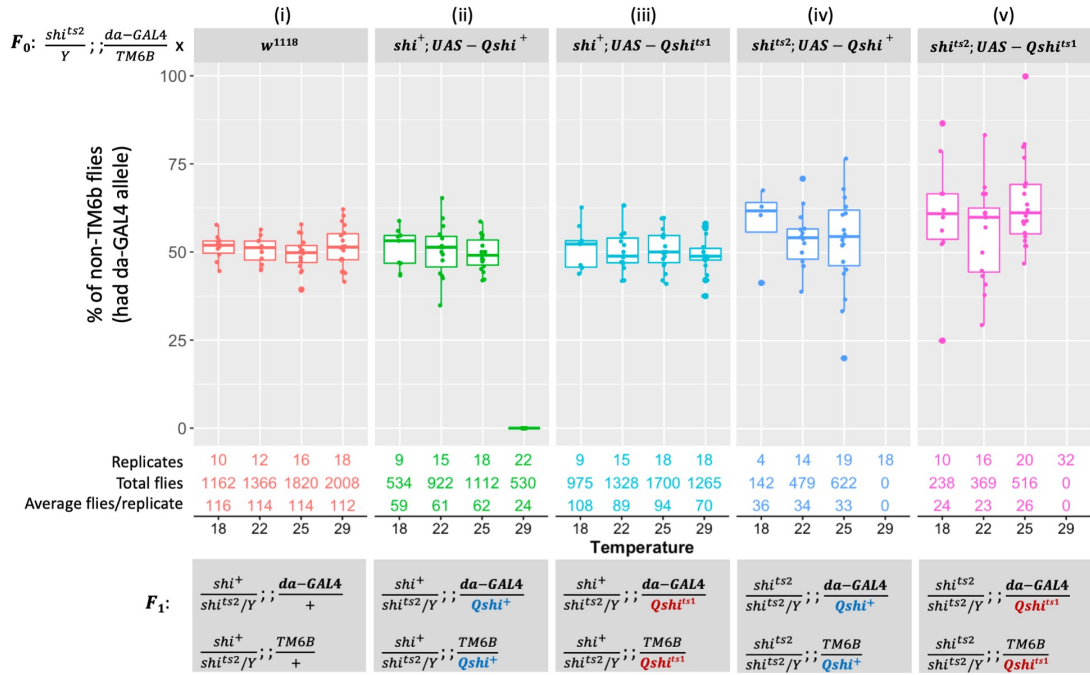

**Supplementary Figure S4. Expressing *B. tryoni shi* wild type (*UAS-Qshi<sup>+</sup>*) and mutant (*UAS-Qshi<sup>ts1</sup>*) transgenes driven by the *shi<sup>ts2</sup>; da-GAL4/TM6B* driver.** In each standard food vial, F<sub>0</sub> crosses were set up by placing three males which were hemizygous for the temperature sensitive *shi<sup>ts2</sup>* mutant allele on the X chromosome, heterozygous for *da-GAL4* and balancer on the 3<sup>rd</sup> chromosome (*shi<sup>ts2</sup>/Y*; +/+; *da-GAL4/TM6B*), and five females of either: (i) control wild type (*w<sup>1118</sup>*), (ii) *Qshi<sup>+</sup>* in wild type background (*shi<sup>+</sup>; UAS-Qshi<sup>+</sup>*), (iii) *Qshi<sup>ts1</sup>* in wild type background (*shi<sup>+</sup>; UAS-Qshi<sup>ts1</sup>*), (iv) *Qshi<sup>+</sup>* in the temperature sensitive background (*shi<sup>ts2</sup>; UAS-Qshi<sup>+</sup>*) or (v) *Qshi<sup>ts1</sup>* in the temperature sensitive background (*shi<sup>ts2</sup>; UAS-Qshi<sup>ts1</sup>*). F<sub>0</sub> parents were allowed to lay eggs for 24 hours at 25°C, then vial contains eggs were either reared at 18°C, 22°C, 25°C or 29°C. In the F<sub>1</sub>, chromosomes are presented in order: sex determination chromosomes; chromosome 2; chromosome 3. F<sub>1</sub> flies with non-TM6B expressed *UAS-Qshi<sup>+</sup>* or *UAS-Qshi<sup>ts1</sup>*, while *TM6B* flies do not express those transgenes. The number of replicates and total counted F<sub>1</sub> flies for each cross at each temperature were indicated. Box plots represent the interquartile range, and the median value is indicated. Error bars represent 1.5 times the interquartile range.

Supplementary Table S1. Fly strains used in this study.

| Strain                                                                                            | Source/Background | Description/Genotype                                                                                                                                                | Technique of generation |
|---------------------------------------------------------------------------------------------------|-------------------|---------------------------------------------------------------------------------------------------------------------------------------------------------------------|-------------------------|
| <i>w<sup>1118</sup></i>                                                                           | BDSC 51629        | white eyes                                                                                                                                                          | NA                      |
| Canton-S                                                                                          | BDSC 64349        | wild type                                                                                                                                                           | NA                      |
| <i>adar/Fm6</i>                                                                                   | Laboratory stock  | Chromosome X balancer                                                                                                                                               | NA                      |
| <i>Gla/CyO</i>                                                                                    | Laboratory stock  | Chromosome 2 balancer                                                                                                                                               | NA                      |
| <i>TM2/TM6B</i>                                                                                   | Laboratory stock  | Chromosome 3 balancer                                                                                                                                               | NA                      |
| <i>shi-GAL4</i>                                                                                   | BDSC 42738        | drive expression ubiquitously (chromosome 2)                                                                                                                        | NA                      |
| <i>da-GAL4</i>                                                                                    | BDSC 55850        | drive ubiquitous expression at all development stages (chromosome 3)                                                                                                | NA                      |
| <i>N-synaptobrevin (nSyb)-Gal4</i><br><i>nSyb-GAL4</i>                                            | BDSC 51635        | drives expression pan-neuronally at all developmental stages (chromosome 3)                                                                                         | NA                      |
| <i>shi<sup>ts2</sup></i>                                                                          | DGRC 106754       | heat sensitive (chromosome X)                                                                                                                                       | NA                      |
| <i>Dp(1:Y)shi<sup>+</sup></i>                                                                     | BDSC 4166         | wild type <i>shi<sup>+</sup></i> allele translocated to Y chromosome in wild type <i>shi<sup>+</sup></i> background                                                 | NA                      |
| ♀ <i>shi<sup>ts2</sup>/shi<sup>ts2</sup></i><br>♂ <i>shi<sup>ts2</sup>/Dp(1:Y)shi<sup>+</sup></i> | Mixed             | females and males are homozygous and hemizygous for <i>shi<sup>ts2</sup></i> , males also carry a translocated wild type <i>shi<sup>+</sup></i> on the Y chromosome | crossing                |
| <i>shi<sup>ts2</sup>; da-GAL4/TM6B</i>                                                            | Mixed             | ubiquitous driver under <i>shi<sup>ts2</sup></i> mutant background                                                                                                  | crossing                |
| <i>shi<sup>ts2</sup>; nSyb-GAL4/TM6B</i>                                                          | Mixed             | Driving expression in a subset of optic lobe neurons under <i>shi<sup>ts2</sup></i> mutant background                                                               | crossing                |
| <i>shi<sup>+</sup>; UAS-Qshi<sup>+</sup></i>                                                      | BestGene          | <i>B. tryoni</i> wild type <i>shi</i> ortholog on 3 <sup>rd</sup> chromosome under wild type <i>shi<sup>+</sup></i> background                                      | NA                      |

|                                                                  |            |                                                                                                                                                                   |          |
|------------------------------------------------------------------|------------|-------------------------------------------------------------------------------------------------------------------------------------------------------------------|----------|
| <i>shi</i> <sup>+</sup> ; <i>UAS-Qshi</i> <sup>ts1</sup>         | BestGene   | <i>B. tryoni</i> temperature sensitive <i>shi</i> <sup>ts1</sup> ortholog on 3 <sup>rd</sup> chromosome under wild type <i>shi</i> <sup>+</sup> background        | NA       |
| <i>shi</i> <sup>ts2</sup> ; <i>UAS-Qshi</i> <sup>+</sup>         | Mixed      | <i>B. tryoni</i> wild type <i>shi</i> ortholog under <i>shi</i> <sup>ts2</sup> mutant background                                                                  | crossing |
| <i>shi</i> <sup>ts2</sup> ; <i>UAS-Qshi</i> <sup>ts1</sup>       | Mixed      | <i>B. tryoni</i> temperature sensitive <i>shi</i> <sup>ts1</sup> ortholog under <i>shi</i> <sup>ts2</sup> mutant background                                       | crossing |
| <i>RpII215</i> <sup>ts</sup>                                     | BDSC 34755 | heat sensitive (chromosome X)                                                                                                                                     | NA       |
| <i>RpII215</i> <sup>ts</sup> ; <i>da-GAL4/TM6B</i>               | Mixed      | heterozygous of ubiquitous driver and <i>TM6B</i> dominant marker on 3 <sup>rd</sup> chromosome in <i>RpII215</i> <sup>ts</sup> mutant background                 | crossing |
| <i>RpII215</i> <sup>+</sup> ; <i>UAS-QRpII215</i> <sup>+</sup>   | BestGene   | <i>B. tryoni</i> wild type <i>RpII215</i> ortholog on 2 <sup>nd</sup> chromosome under wild type <i>RpII215</i> <sup>+</sup> background                           | NA       |
| <i>RpII215</i> <sup>+</sup> ; <i>UAS-QRpII215</i> <sup>ts</sup>  | BestGene   | <i>B. tryoni</i> temperature sensitive <i>RpII215</i> <sup>ts</sup> ortholog on 2 <sup>nd</sup> chromosome under wild type <i>RpII215</i> <sup>+</sup> background | NA       |
| <i>RpII215</i> <sup>ts</sup> ; <i>UAS-QRpII215</i> <sup>+</sup>  | Mixed      | <i>B. tryoni</i> wild type <i>RpII215</i> ortholog under <i>RpII215</i> <sup>ts</sup> mutant background                                                           | crossing |
| <i>RpII215</i> <sup>ts</sup> ; <i>UAS-QRpII215</i> <sup>ts</sup> | Mixed      | <i>B. tryoni</i> temperature sensitive <i>RpII215</i> <sup>ts</sup> ortholog under <i>RpII215</i> <sup>ts</sup> mutant background                                 | crossing |
| <i>UAS-mCD8-GFP</i>                                              | BDSC       | express CD8 tagged GFP on the cell membrane under control of UAS                                                                                                  | NA       |

\*BDSC = Bloomington Drosophila Stock Centre

\*DGRC = Kyoto Stock Centre

\*NA = not applicable to this strain

\*TM6B: carries dominant balancer Humeral and Tubby. Humeral – adult flies have additional bristles in the humerus; Tubby – larvae, pupae and adults had shorter body compared to wild type

\*♀: female, ♂: male

\*The crossing strategies for strains generated by crossing were illustrated in supplementary materials

**Supplementary Table S2. Strategy for placing *Drosophila melanogaster* *da-GAL4* driver in the *D. melanogaster* *shi<sup>ts2</sup>* mutant background.** Chromosomes are presented in order: sex chromosomes; chromosome 2; chromosome 3. ‘+’ refers to wild type and ‘7’ indicates the Y chromosome. The crosses were set up in order from the top to the bottom rows. The progeny used for each cross were coloured in blue. Virgin females were used for each cross. The equivalent crossing strategy were used to place *nSyb-GAL4* driver in the *D. melanogaster* *shi<sup>ts2</sup>* mutant background, and *da-GAL4* driver in the *D. melanogaster* *RpII215<sup>ts</sup>* mutant background.

|                                                                                                                       |                                                                                  |
|-----------------------------------------------------------------------------------------------------------------------|----------------------------------------------------------------------------------|
| $\frac{adar}{Fm6};;\frac{+}{+} \times \frac{shi^{ts2}}{7};;\frac{+}{+}$                                               | $\frac{adar}{Fm6};;\frac{+}{+} \times \frac{+}{7};;\frac{TM2}{TM6B}$             |
| $\frac{shi^{ts2}}{Fm6};;\frac{+}{+} \times \frac{+}{7};;\frac{TM2}{TM6B}$                                             | $\frac{Fm6}{+};;\frac{+}{TM6B} \times \frac{+}{7};;\frac{da-GAL4}{da-GAL4}$      |
| $\frac{shi^{ts2}}{Fm6};;\frac{+}{+} \times \frac{shi^{ts2}}{7};;\frac{+}{TM6B}$                                       | $\frac{Fm6}{+};;\frac{da-GAL4}{TM6B} \times \frac{Fm6}{7};;\frac{da-GAL4}{TM6B}$ |
| $\frac{shi^{ts2}}{Fm6};;\frac{+}{TM6B} \times \frac{Fm6}{7};;\frac{da-GAL4}{da-GAL4}$                                 |                                                                                  |
| $\frac{shi^{ts2}}{Fm6};;\frac{da-GAL4}{TM6B} \times \frac{shi^{ts2}}{7};;\frac{da-GAL4}{TM6B}$                        |                                                                                  |
| $\frac{shi^{ts2}}{shi^{ts2}};;\frac{da-GAL4}{TM6B} \times \frac{shi^{ts2}}{7};;\frac{da-GAL4}{TM6B}$<br>(Final stock) |                                                                                  |



**Supplementary Table S3. Strategy for placing *Drosophila melanogaster* mutant *UAS-Qshi<sup>ts1</sup>* allele in the *D. melanogaster shi<sup>ts2</sup>* mutant background.** Refer to Table S2 for table explanation. The same crossing strategy outlined below was used to place the wild type *UAS-Qshi<sup>+</sup>* allele in the *D. melanogaster shi<sup>ts2</sup>* mutant background.

|                                                                                                                                                               |                                                                                                      |
|---------------------------------------------------------------------------------------------------------------------------------------------------------------|------------------------------------------------------------------------------------------------------|
| $\frac{adar}{Fm6} ; ; \frac{+}{+} \times \frac{shi^{ts2}}{7} ; ; \frac{+}{+}$                                                                                 | $\frac{adar}{Fm6} ; ; \frac{+}{+} \times \frac{+}{7} ; ; \frac{TM2}{TM6B}$                           |
| $\frac{shi^{ts2}}{Fm6} ; ; \frac{+}{+} \times \frac{+}{7} ; ; \frac{TM2}{TM6B}$                                                                               | $\frac{Fm6}{+} ; ; \frac{+}{TM6B} \times \frac{+}{7} ; ; \frac{UAS-Qshi^{ts1}}{UAS-Qshi^{ts1}}$      |
| $\frac{shi^{ts2}}{Fm6} ; ; \frac{+}{+} \times \frac{shi^{ts2}}{7} ; ; \frac{+}{TM6B}$                                                                         | $\frac{Fm6}{+} ; ; \frac{UAS-Qshi^{ts1}}{TM6B} \times \frac{Fm6}{7} ; ; \frac{UAS-Qshi^{ts1}}{TM6B}$ |
| $\frac{shi^{ts2}}{Fm6} ; ; \frac{+}{TM6B} \times \frac{Fm6}{7} ; ; \frac{UAS-Qshi^{ts1}}{UAS-Qshi^{ts1}}$                                                     |                                                                                                      |
| $\frac{shi^{ts2}}{Fm6} ; ; \frac{UAS-Qshi^{ts1}}{TM6B} \times \frac{shi^{ts2}}{7} ; ; \frac{UAS-Qshi^{ts1}}{TM6B}$                                            |                                                                                                      |
| $\frac{shi^{ts2}}{shi^{ts2}} ; ; \frac{UAS-Qshi^{ts1}}{UAS-Qshi^{ts1}} \times \frac{shi^{ts2}}{7} ; ; \frac{UAS-Qshi^{ts1}}{UAS-Qshi^{ts1}}$<br>(Final stock) |                                                                                                      |

**Supplementary Table S4. Strategy for placing *Drosophila melanogaster* mutant *UAS-QRpII215<sup>ts</sup>* allele in the *D. melanogaster* *RpII215<sup>ts</sup>* mutant background.** The equivalent crossing strategy were used to place wild type *UAS-QRpII215<sup>+</sup>* allele in the *D. melanogaster* *RpII215<sup>ts</sup>* mutant background.

|                                                                                                                                                             |                                                                                                    |
|-------------------------------------------------------------------------------------------------------------------------------------------------------------|----------------------------------------------------------------------------------------------------|
| $\frac{adar}{Fm6}; \frac{+}{+} \times \frac{RpII215^{ts}}{7}; \frac{+}{+}$                                                                                  |                                                                                                    |
| $\frac{RpII215^{ts}}{Fm6}; \frac{+}{+} \times \frac{+}{7}; \frac{Gla}{CyO}$                                                                                 |                                                                                                    |
| $\frac{+}{Fm6}; \frac{Gla}{+} \times \frac{RpII215^{ts}}{7}; \frac{+}{CyO}$                                                                                 | $\frac{+}{Fm6}; \frac{Gla}{+} \times \frac{+}{7}; \frac{UAS-QRpII215^{ts}}{CyO}$                   |
| $\frac{RpII215^{ts}}{Fm6}; \frac{+}{CyO} \times \frac{Fm6}{7}; \frac{UAS-QRpII215^{ts}}{Gla}$                                                               | $\frac{+}{Fm6}; \frac{UAS-QRpII215^{ts}}{Gla} \times \frac{Fm6}{7}; \frac{UAS-QRpII215^{ts}}{Gla}$ |
| $\frac{RpII215^{ts}}{Fm6}; \frac{UAS-QRpII215^{ts}}{CyO} \times \frac{Fm6}{7}; \frac{UAS-QRpII215^{ts}}{Gla}$                                               |                                                                                                    |
| $\frac{RpII215^{ts}}{Fm6}; \frac{UAS-QRpII215^{ts}}{UAS-QRpII215^{ts}} \times \frac{RpII215^{ts}}{7}; \frac{UAS-QRpII215^{ts}}{UAS-QRpII215^{ts}}$          |                                                                                                    |
| $\frac{RpII215^{ts}}{RpII215^{ts}}; \frac{UAS-QRpII215^{ts}}{UAS-QRpII215^{ts}} \times \frac{RpII215^{ts}}{7}; \frac{UAS-QRpII215^{ts}}{UAS-QRpII215^{ts}}$ |                                                                                                    |
| (Final stock)                                                                                                                                               |                                                                                                    |

**Supplementary Table S5. Primers used in this study.**

| Name               | Sequence (5' to 3')   | Annealing temperature<br>T <sub>m</sub> (°C) | Product size<br>(bp) | Description                                                                                      |
|--------------------|-----------------------|----------------------------------------------|----------------------|--------------------------------------------------------------------------------------------------|
| Fwd5917            | GGTTACATTGGCGTGGTG    | 60                                           | 814                  | To amplify and sequence <i>B. tryoni shi</i> of the <i>D. melanogaster</i> transgenic stocks     |
| Rev6732            | CTGAGCATTCGCAAAGCC    |                                              |                      |                                                                                                  |
| RpII215_Gblock2_F2 | GCGATACGGAGAAGATGGTC  | 60                                           | 1461                 | To amplify and sequence <i>B. tryoni RpII215</i> of the <i>D. melanogaster</i> transgenic stocks |
| RpII215_Gblock3_R1 | TTCCTGACAGCCTCAA TTCC |                                              |                      |                                                                                                  |
| Choo_shits_PCRFwd  | GGTTACATTGGCGTGGTG    | 60                                           | 659                  | To amplify and sequence <i>D. melanogaster shi</i>                                               |
| Choo_shits_PCRRev  | CTGAGCATTCGCAAAGCC    |                                              |                      |                                                                                                  |
| RpII215_F          | CGACGGAACAGTGCCTAAC   | 60                                           | 583                  | To amplify and sequence <i>D. melanogaster RpII215</i>                                           |
| RpII215_R          | GACCAACCACTCAAACGCC   |                                              |                      |                                                                                                  |

## References

Gilchrist, A. S., Shearman, D. C. A., Frommer, M., Raphael, K. A., Deshpande, N. P., Wilkins, M. R., Sherwin, W. B., & Sved, J. A. (2014). The draft genome of the pest tephritid fruit fly *Bactrocera tryoni*: resources for the genomic analysis of hybridising species. *BMC Genomics*, 15(1), 1153. <https://doi.org/10.1186/1471-2164-15-1153>
